# Supplementary material
Source: PubMed Central journal article supplement (PMC1567672)
Supplement: pnas_0602310103_2.pdf [file pnas_0602310103_2.pdf]

**Table 3. Comparison of the kinetic parameters obtained for residues of Groups 1, 2, and 3 as defined in Tables 1 and 2**

| Group | $\chi^2/N$ | 12°C           |               | 17°C          |               | 22°C           |                | 27°C           |                |
|-------|------------|----------------|---------------|---------------|---------------|----------------|----------------|----------------|----------------|
|       |            | $k_a, s^{-1}$  | $k_b, s^{-1}$ | $k_a, s^{-1}$ | $k_b, s^{-1}$ | $k_a, s^{-1}$  | $k_b, s^{-1}$  | $k_a, s^{-1}$  | $k_b, s^{-1}$  |
| 1     | 0.6        | —              | —             | $5.7 \pm 0.2$ | $725 \pm 59$  | $10.1 \pm 0.3$ | $1,242 \pm 56$ | $16.9 \pm 0.8$ | $2,008 \pm 94$ |
| 2     | 0.8        | $22.1 \pm 0.5$ | $144 \pm 10$  | $36 \pm 0.6$  | $223 \pm 10$  | $60 \pm 1$     | $355 \pm 8$    | $96 \pm 4$     | $539 \pm 10$   |
| 3     | 0.8        | $83 \pm 5$     | $393 \pm 7$   | $116 \pm 5$   | $611 \pm 7$   | $165 \pm 9$    | $972 \pm 11$   | $227 \pm 16$   | $1,473 \pm 26$ |

Relaxation dispersion data were fit directly to a model where  $k_a$  and  $k_b$  were constrained according to the relation  $k_{a/b} = \frac{k_B T}{h} \exp(-\Delta G_{a/b}^+ / RT)$ . Chemical-shift differences between states  $a$  and  $b$ ,  $\Delta\omega$ , were allowed to vary with temperature. Note that in Tables 1 and 2, parameters were obtained from fits where rates were not constrained to a specific functional form and where temperature-independent  $\Delta\omega$  values were assumed.
