# Supplementary material
Source: PubMed Central journal article supplement (PMC1567672)
Supplement: pnas_0602310103_3.pdf [file pnas_0602310103_3.pdf]

**Table 4. Comparison of the thermodynamic parameters obtained for residues of Groups 1, 2, and 3 as defined in Tables 1 and 2**

| Group | Forward                      |                               | Reverse                      |                               | Equilibrium         |                      | Barrier $\Delta G^\ddagger$ at 22°C, kJ/mol |                |
|-------|------------------------------|-------------------------------|------------------------------|-------------------------------|---------------------|----------------------|---------------------------------------------|----------------|
|       | $\Delta H^\ddagger$ , kJ/mol | $\Delta S^\ddagger$ , J/mol K | $\Delta H^\ddagger$ , kJ/mol | $\Delta S^\ddagger$ , J/mol K | $\Delta H$ , kJ/mol | $\Delta S$ , J/mol K | Forward                                     | Reverse        |
| 1     | $75 \pm 5$                   | $27 \pm 15$                   | $70 \pm 7$                   | $50 \pm 22$                   | $5 \pm 5$           | $-23 \pm 16$         | $66.7 \pm 0.1$                              | $54.8 \pm 0.1$ |
| 2     | $67 \pm 2$                   | $17 \pm 8$                    | $60 \pm 4$                   | $8 \pm 12$                    | $7 \pm 4$           | $9 \pm 12$           | $62.3 \pm 0.1$                              | $57.9 \pm 0.1$ |
| 3     | $45 \pm 4$                   | $-49 \pm 13$                  | $60 \pm 1$                   | $17 \pm 5$                    | $-15 \pm 4$         | $-66 \pm 13$         | $59.8 \pm 0.1$                              | $55.5 \pm 0.1$ |

Relaxation dispersion data were fit directly to a model where  $k_a$  and  $k_b$  were constrained according to the relation  $k_{a/b} = \frac{k_B T}{h} \exp(-\Delta G_{a/b}^\ddagger / RT)$ . Chemical shift differences between states  $a$  and  $b$ ,  $\Delta\omega$ , were allowed to vary with temperature. Note that in Tables 1 and 2, parameters were obtained from fits where rates were not constrained to a specific functional form and where temperature-independent  $\Delta\omega$  values were assumed.
