# Supplementary material
Source: PubMed Central journal article supplement (PMC1567672)
Supplement: pnas_0602310103_4.pdf [file pnas_0602310103_4.pdf]

**Table 5. Comparison of the kinetic parameters obtained for residues of Groups 1, 2, and 3 as defined in Tables 1 and 2**

| Group | $\chi^2/N$ | 12°C           |               | 17°C           |               | 22°C           |                | 27°C           |                |
|-------|------------|----------------|---------------|----------------|---------------|----------------|----------------|----------------|----------------|
|       |            | $k_a, s^{-1}$  | $k_b, s^{-1}$ | $k_a, s^{-1}$  | $k_b, s^{-1}$ | $k_a, s^{-1}$  | $k_b, s^{-1}$  | $k_a, s^{-1}$  | $k_b, s^{-1}$  |
| 1     | 0.6        | –              | –             | $5.8 \pm 0.2$  | $788 \pm 53$  | $10.0 \pm 0.3$ | $1,274 \pm 55$ | $16.3 \pm 0.8$ | $1,958 \pm 84$ |
| 2     | 0.9        | $21.9 \pm 0.3$ | $128 \pm 7$   | $35.6 \pm 0.5$ | $209 \pm 8$   | $60 \pm 1$     | $351 \pm 8$    | $94 \pm 3$     | $558 \pm 9$    |
| 3     | 1.0        | $79 \pm 3$     | $384 \pm 7$   | $108 \pm 4$    | $605 \pm 7$   | $150 \pm 6$    | $978 \pm 10$   | $201 \pm 9$    | $1,502 \pm 24$ |

Relaxation dispersion data were fit directly to a model where  $k_a$  and  $k_b$  were constrained according to the relation  $k_{a/b} = \frac{k_B T}{h} \exp(-\Delta G_{a/b}^+ / RT)$ . Chemical-shift differences were assumed to be temperature independent. Note that in Tables 1 and 2, parameters were obtained from fits where rates were not constrained to a specific functional form and where temperature-independent  $\Delta\omega$  values were assumed.
