# Supplementary material
Source: PubMed Central journal article supplement (PMC1567672)
Supplement: pnas_0602310103_5.pdf [file pnas_0602310103_5.pdf]

**Table 6. Comparison of the thermodynamic parameters obtained for residues of Groups 1, 2, and 3 as defined in Tables 1 and 2**

| Group | Forward                      |                               | Reverse                      |                               | Equilibrium         |                      | Barrier $\Delta G^\ddagger$ at 22°C, kJ/mol |            |
|-------|------------------------------|-------------------------------|------------------------------|-------------------------------|---------------------|----------------------|---------------------------------------------|------------|
|       | $\Delta H^\ddagger$ , kJ/mol | $\Delta S^\ddagger$ , J/mol K | $\Delta H^\ddagger$ , kJ/mol | $\Delta S^\ddagger$ , J/mol K | $\Delta H$ , kJ/mol | $\Delta S$ , J/mol K | Forward                                     | Reverse    |
| 1     | 72 ± 4                       | 16 ± 14                       | 62 ± 5                       | 26 ± 17                       | 9 ± 3               | -9 ± 4               | 66.7 ± 0.1                                  | 54.8 ± 0.1 |
| 2     | 67 ± 1                       | 15 ± 4                        | 67 ± 3                       | 32 ± 9                        | -1 ± 3              | -16 ± 10             | 62.3 ± 0.1                                  | 58.0 ± 0.1 |
| 3     | 42 ± 2                       | -62 ± 6                       | 62 ± 1                       | 23 ± 4                        | -21 ± 1             | -85 ± 4              | 60.1 ± 0.1                                  | 55.4 ± 0.1 |

Relaxation dispersion data were fit directly to a model where  $k_a$  and  $k_b$  were constrained according to the

relation  $k_{a/b} = \frac{k_B T}{h} \exp(-\Delta G_{a/b}^\ddagger / RT)$ . Chemical shift differences were assumed to be temperature-

independent. Note that in Tables 1 and 2, parameters were obtained from fits where rates were not

constrained to a specific functional form and where temperature-independent  $\Delta\omega$  values were assumed.
