# Supplementary material
Source: PubMed Central journal article supplement (PMC1567672)

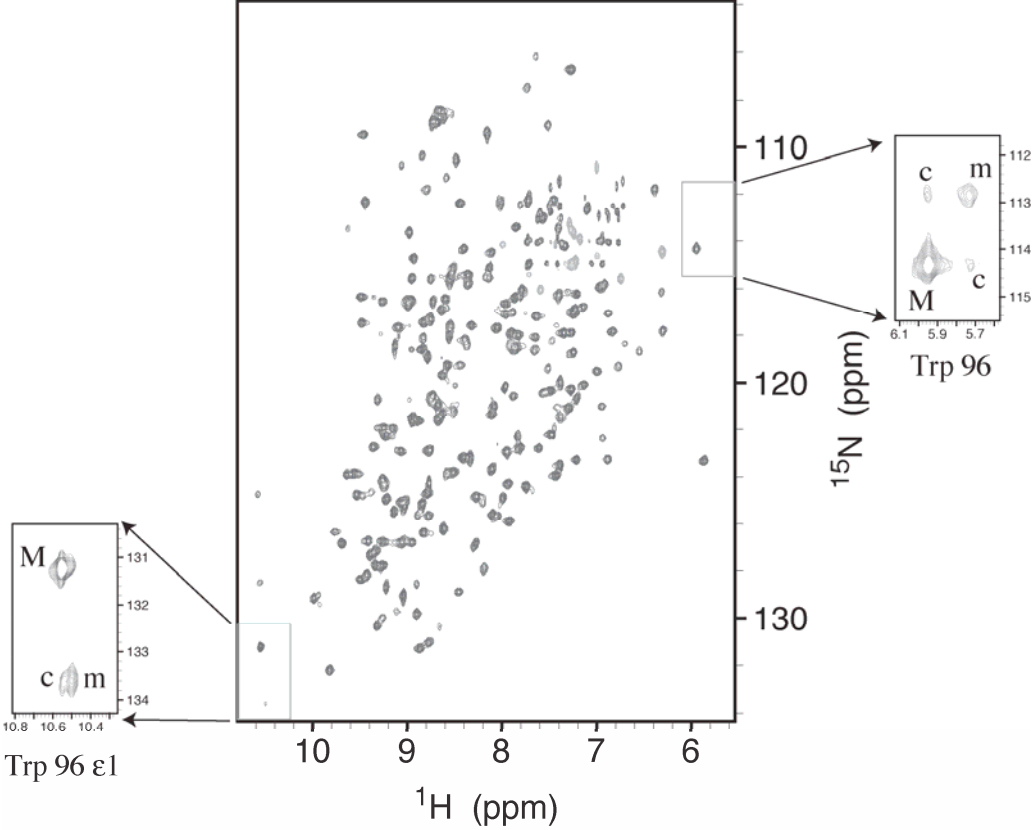

Supplement: pnas_0602310103_1.pdf [file pnas_0602310103_1.pdf]
